# Supplementary material for: Establishment of Novel Mouse Model of Dietary NASH Rapidly Progressing into Liver Cirrhosis and Tumors
Source: MDPI journal article supplement (doi:10.3390/cancers15143744), 2023-07-24

## **Supporting information**

### **Index of supplementary figures and tables:**

**Supplementary Table S1.** Composition of AIN93M and OYC-NASH2.

**Supplementary Table S2.** Primer pairs used for qPCR analysis.

**Supplementary Figure S1.** Experimental design and time course of weight change in C57BL/6J mice fed the OYC-NASH2 diet for 60 weeks.

**Supplementary Table S1. Composition of AIN93M and OYC-NASH2.**

|                                    | Name of nutrient            | Unit                | AIN-93M | OYC-NASH2 |
|------------------------------------|-----------------------------|---------------------|---------|-----------|
| <b>General ingredients</b>         | Water                       | g/100g(diet)        | 9.0     | 9.0       |
|                                    | Crude protein               | g/100g(diet)        | 12.7    | 17.1      |
|                                    | Crude fat                   | g/100g(diet)        | 4.3     | 27.4      |
|                                    | Rough grey                  | g/100g(diet)        | 3.0     | 2.9       |
|                                    | Crude fiber                 | g/100g(diet)        | 5.0     | 4.7       |
|                                    | NFE                         | g/100g(diet)        | 65.9    | 39.0      |
|                                    | Calories                    | kcal/100g(diet)     | 353.5   | 470.5     |
| <b>Calorie ratio</b>               | Protein calorie ratio       | %/ calorie          | 14.4    | 14.5      |
|                                    | Fat calorie ratio           | %/ calorie          | 11.1    | 52.3      |
|                                    | NFE calorie ratio           | %/ calorie          | 74.5    | 33.2      |
| <b>Main fatty acid composition</b> | Saturated fatty acid        | %/total fatty acids | 15.9    | 41.7      |
|                                    | Monounsaturated fatty acid  | %/total fatty acids | 23.8    | 46.4      |
|                                    | Polyunsaturated fatty acids | %/total fatty acids | 60.1    | 10.1      |
| <b>Others important ingredient</b> | Amount of methionine added  | g                   | 0.34    | 0.11      |
|                                    | Amount of choline added     | g                   | 0.18    | -         |

NFE: Nitrogen-Free Extract

**Supplementary Table S2. Primer pairs used for qPCR analysis.**

| <b>Gene</b>     | <b>Accession #</b> | <b>Primer sequence (5'-3')</b>                                   |
|-----------------|--------------------|------------------------------------------------------------------|
| <i>18S rRNA</i> | NR_003278          | F 5'-CACGGACAGGATTGACAGATTG-3'<br>R 5'-CAGACAAATCGCTCCACCAA-3'   |
| <i>Acta2</i>    | NM_007392          | F 5'-ACTGGGACGACATGGAAAAG-3'<br>R 5'-GTTCAGTGGTGCCTCTGTCA-3'     |
| <i>Afp</i>      | NM_007423          | F 5'-AGTTTCCAGAACCTGCCGAG-3'<br>R 5'-ACCTTGTCGTACTGAGCAGC-3'     |
| <i>Casp1</i>    | NM_009807          | F 5'-TACCTGGCAGGAATTCTGGA-3'<br>R 5'-AGTCCTGGAAATGTGCCATC-3'     |
| <i>Ccl2</i>     | NM_011333          | F 5'-AGGTCCCTGTGTCATGCTTCTG-3'<br>R 5'-GGGATCATCTTGCTGGTGAA-3'   |
| <i>Ccnd1</i>    | NM_007631          | F 5'-CCAGAGGCGGATGAGAACAA-3'<br>R 5'-ATGGAGGGTGGGTGGAAA-3'       |
| <i>Cdk4</i>     | NM_009870          | F 5'-CCTGAGGACATACCTGGACAAAG-3'<br>R 5'-CCGCTTAGAAACTGACGCATT-3' |
| <i>Cd68</i>     | NM_001291058       | F 5'-GAGGTTGTGACGGTACCCAT-3'<br>R 5'-ACATTGTATTCCACCGCCAT-3'     |
| <i>Clec1b</i>   | NM_019985.3        | F 5'-CTGGGGATCATGTGCGGTCAC-3'<br>R 5'-TGGTATCTCCACTTCGTGGC-3'    |
| <i>Clec4f</i>   | NM_016751.3        | F 5'-TCACTACTGTGGGCTTGCAG-3'<br>R 5'-GACTTAGGCCCCAGTCCTTG-3'     |
| <i>Col1a1</i>   | NM_007742          | F 5'-ACATGTTTCAGCTTTGTGGACC-3'<br>R 5'-TAGGCCATTGTGTATGCAGC-3'   |
| <i>Cxcr3</i>    | NM_009910.3        | F 5'-AGCCATGTACCTTGAGGTTAG-3'<br>R 5'-GTCAGAGAAGTCGCTCTCGT-3'    |
| <i>Cxcr6</i>    | NM_030712.4        | F 5'-ACTGGGCTTCTCTTCTGATGCC-3'<br>R 5'-CACTACCAGGTACACACAGGG-3'  |
| <i>Ddit3</i>    | NM_007837          | F 5'-CAGCGACAGAGCCAGAATAA-3'<br>R 5'-GACCAGGTTCTGCTTTCAGG-3'     |
| <i>Itgam</i>    | NM_008401          | F 5'-ATTCGGTGATCCCTTGGATT-3'<br>R 5'-GTTTGTTGAAGGCATTTCCC-3'     |

|                |                |   |                                  |
|----------------|----------------|---|----------------------------------|
| <i>Itga2</i>   | NM_008396.3    | F | 5'-GCGGCTGCTAATGCTAGTTC-3'       |
|                |                | R | 5'-CCAACCAGTAGCCAGTTGCC-3'       |
| <i>Klrb1c</i>  | NM_001159904.2 | F | 5'-GGGATGAGTGTCTTAGTGCGAG-3'     |
|                |                | R | 5'-CCAGTCTTGTGGGCACTCTAAA-3'     |
| <i>Lgals3</i>  | NM_010705      | F | 5'-GTACAGCTAGCGGAGCGG-3'         |
|                |                | R | 5'-CGGATATCCTTGAGGGTTTG-3'       |
| <i>Myc</i>     | NM_010849      | F | 5'-AGCCCCTAGTGCTGCATGA-3'        |
|                |                | R | 5'-GTTTGCCTCTTCTCCACAGACA-3'     |
| <i>Nrf2</i>    | NM_007527      | F | 5'-GGACATGGAGCAAGTTTGGC-3'       |
|                |                | R | 5'-GGCCTCAGCCCATCTTCTTC-3'       |
| <i>Ncf1</i>    | NM_010876      | F | 5'-GCCCAAAGATGGCAAGAATAAC-3'     |
|                |                | R | 5'-TAGTCAGCAATGGCCCGATAG-3'      |
| <i>Pcna</i>    | NM_011045      | F | 5'-AGGAGGCGGTAACCATAGAGA-3'      |
|                |                | R | 5'-GAGACAGTGGAGTGGCTTTTG-3'      |
| <i>p16</i>     | NM_001040654   | F | 5'-ATGGAGTCCGCTGCAGACAGAC-3'     |
|                |                | R | 5'-ACGTTGCCCATCATCATCACCTGA-3'   |
| <i>Spp1</i>    | NM_009263      | F | 5'-CTCCTTGCGCCACAGAATG-3'        |
|                |                | R | 5'-TTGGAAGAGTTTCTTGCTTAAAGTCA-3' |
| <i>Sqstm1</i>  | NM_011018      | F | 5'-GTGGGACAGCCAGAGGAACAG-3'      |
|                |                | R | 5'-TGAGGGGTCTAGAGAGCTTGG-3'      |
| <i>Tgf</i>     | NM_011577      | F | 5'-GGAGAGCCCTGGATACCAAC-3'       |
|                |                | R | 5'-CAACCCAGGTCCTTCCTAAA-3'       |
| <i>Timd4</i>   | NM_178759.4    | F | 5'-GTCCGCCTTCACTACAGAATCA-3'     |
|                |                | R | 5'-CTGCAAAGACTCACTTGTTGTT-3'     |
| <i>Tnf</i>     | NM_013693      | F | 5'-CCACCACGCTCTTCTGTCTAC-3'      |
|                |                | R | 5'-AGGGTCTGGGCCATAGAACT-3'       |
| <i>Tnfsf14</i> | NM_019418.4    | F | 5'-AGCACATCTTACAGGAGCCAAC-3'     |
|                |                | R | 5'-AGTAACCGGGCTCCATGGTC-3'       |
| <i>Vsig4</i>   | NM_177789.5    | F | 5'-GCACTCCTCTTTGGAAGCAAC-3'      |
|                |                | R | 5'-TCCCTGAACCAGCAATGGTC-3'       |

---

*F*, forward sequence; *R*, reverse sequence.

*Acta2*, actin a2 smooth muscle aorta

*Afp*, alpha fetoprotein

*Casp1*, caspase 1

*Ccl2*, chemokine (C-C motif) ligand 2  
*Ccnd1*, cyclin D1  
*Cdk4*, cyclin-dependent kinase 4  
*Cd68*, CD68 antigen  
*Clec1b*, C-type lectin domain family 1, member b  
*Clec4f*, C-type lectin domain family 4, member f  
*Col1a1*, collagen type I alpha 1 chain  
*Cxcr3*, chemokine (C-X-C motif) receptor 3  
*Cxcr6*, chemokine (C-X-C motif) receptor 6  
*Ddit3*, DNA damage-inducible transcript 3  
*Itgam*, integrin alpha M  
*Klrb1c*, killer cell lectin-like receptor subfamily B member 1C  
*Lgals3*, lectin, galactose binding, soluble 3  
*Myc*, myelocytomatosis oncogene  
*Nrf2*, Nuclear factor erythroid 2-related factor 2  
*Pcna*, proliferating cell nuclear antigen  
*p16*, cyclin dependent kinase inhibitor 2A  
*Ncf1*, Neutrophil cytosol factor 1  
*Spp1*, secreted phosphoprotein 1  
*Sqstm1*, sequestosome 1  
*Tgf*, transforming growth factor beta 1  
*Timd4*, T cell immunoglobulin and mucin domain containing 4  
*Tnf*, tumor necrosis factor alpha  
*Tnfsf14*, tumor necrosis factor (ligand) superfamily, member 14  
*Vsig4*, V-set and immunoglobulin domain containing 4

**Supplementary Figure S1. Experimental design and time course of weight change in C57BL/6J mice fed OYC-NASH2 diet.**

(A) C57BL/6J mice were divided into two groups, the control group (n=41) was fed a AIN93M diet and the OYC-NASH2 group (n=74, two mice died at 60 weeks) was fed the OYC-NASH2 diet for 60 weeks. (B) Body weight and some organ weight ratios of mice during the feeding period. Data are expressed as the means  $\pm$  SEM. \* $P < 0.05$ , \*\* $P < 0.01$  and \*\*\* $P < 0.001$  between AIN93M diet group and OYC-NASH2 diet group. Con, control; eWAT, epididymal white adipose tissue; W, week of the treatment.

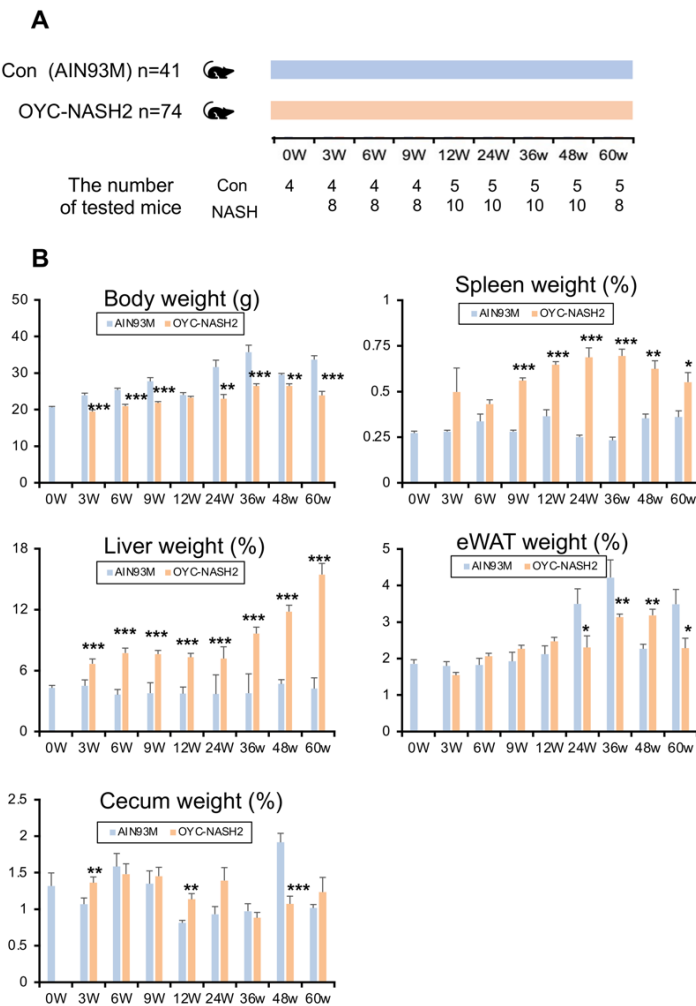

Supplement: s1 [file s1]
